# Supplementary material
Source: MDPI journal article supplement (https://www.mdpi.com/2076-3271/9/2/40)
Supplement: s1 [file s1]

Supplementary Material:

**Table S1.** Nucleic acid extraction kits mostly used in the study.

| Nucleic acid extraction kit                                   | Manufacturer                  | Utilization | Technology     |
|---------------------------------------------------------------|-------------------------------|-------------|----------------|
| QIAamp® Viral RNA Mini Kit                                    | Qiagen, Germany               | Manual      | Spin columns   |
| AccuPrep® Viral RNA Extraction Kit                            | Bioneer, Korea                | Manual      | Spin columns   |
| MagMAX™ Viral/Pathogen II (MVP II) Nucleic Acid Isolation Kit | Thermo Fisher Scientific, USA | Automated   | Magnetic beads |
| ID Gene™ Mag Virus Extraction Kit                             | ID-Solutions, France          | Automated   | Magnetic beads |

**Table S2.** COVID-19 RT-PCR kits mostly used in the study.

| COVID-19 RT-PCR Kit                           | Manufacturer                            | Gene Targets                                         |
|-----------------------------------------------|-----------------------------------------|------------------------------------------------------|
| TaqPath™ COVID-19 CE-IVD RT-PCR Kit           | Thermo Fisher Scientific, USA           | <i>S</i> gene<br><i>N</i> gene<br><i>ORF1ab</i> gene |
| Maccura SARS-CoV-2 Nucleic Acid Detection Kit | Maccura Biotechnology, China            | <i>E</i> gene<br><i>N</i> gene<br><i>ORF1ab</i> gene |
| GeneFinder™ COVID-19 Plus RealAmp Kit         | GeneFinder; Infopia Inc., Anyang, Korea | <i>E</i> gene<br><i>N</i> gene<br><i>RdRp</i> gene   |

**Table S3.** Results interpretation.

| SARS-CoV-2 <i>ORF1ab</i> | SARS-CoV-2 <i>N</i>                     | SARS-CoV-2 <i>S</i> | Result                  |
|--------------------------|-----------------------------------------|---------------------|-------------------------|
| Negative                 | Negative                                | Negative            | SARS-CoV-2 not detected |
|                          | Only one SARS-CoV-2 target positive     |                     | SARS-CoV-2 inconclusive |
|                          | Two or more SARS-CoV-2 targets positive |                     | SARS-CoV-2 positive     |
